# Supplementary material
Source: PubMed Central journal article supplement (PMC3585059)
Supplement: supp_M112.429605_jbc.M112.429605-1.pdf [file supp_M112.429605_jbc.M112.429605-1.pdf]

## Supplementary Figure S1

| LSD1/HDACs/CtBP Complex |              | MBT Family Proteins         |                     |
|-------------------------|--------------|-----------------------------|---------------------|
| Name                    | No. Peptides | Name                        | No. Peptides        |
| KDM1A (LSD1)            | 48           | SFMBT1                      | 46                  |
| RCOR1 (CoREST)          | 30           | SFMBT2                      | 2                   |
| RCOR2                   | 12           | L3MBTL3                     | 34                  |
| RCOR3                   | 19           | L3MBTL4                     | 1                   |
| PHF21A (BHC80)          | 27           | Polycomb Repressive Complex |                     |
| HDAC1                   | 25           | <b>Name</b>                 | <b>No. Peptides</b> |
| HDAC2                   | 15           | PHC1                        | 16                  |
| HMG20B (BRAFF35)        | 22           | PHC2                        | 6                   |
| HMG20A                  | 12           | PHC3                        | 8                   |
| CTBP1                   | 8            | CBX2                        | 6                   |
| CTBP2                   | 11           | CBX4                        | 7                   |
| ZMYM2                   | 38           | CBX8                        | 7                   |
| ZMYM3                   | 8            | RING1                       | 3                   |
| ZNF217                  | 22           | RNF2 (RING2)                | 11                  |
| KIAA0182 (GSE1)         | 27           | SCML2                       | 14                  |
| GTF2I                   | 5            | BMI1                        | 3                   |
| RREB1                   | 25           | RBBP7                       | 1                   |

**Supplementary Figure S1. Identification of SFMBT1-associated proteins by mass spectrometric analysis.** SFMBT1-associated proteins were identified by mass spectrometric analysis of the SFMBT1 protein complex isolated from nuclear extracts of FLAG-SFMBT1-expressing 293T cells with anti-FLAG (M2) agarose beads. The number of peptides for each protein was indicated.

Supplementary Figure S2

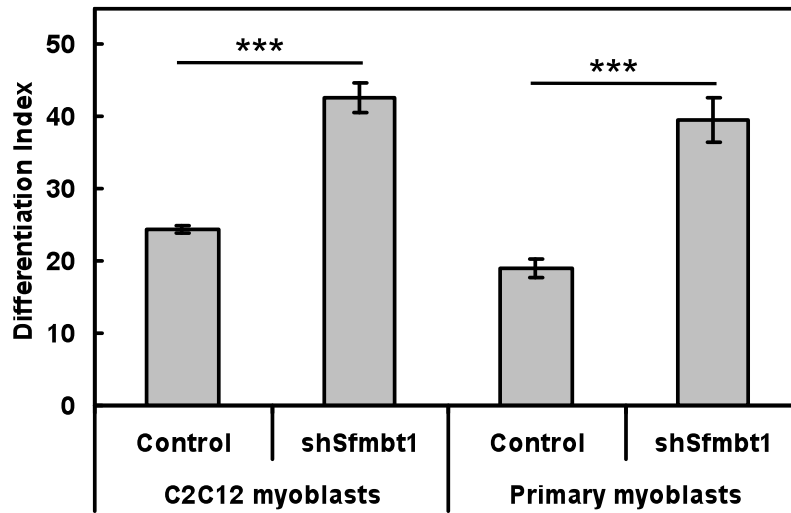

**Supplementary Figure S2. Knockdown of Sfmbt1 in C2C12 and primary myoblasts promotes myogenic differentiation.** Differentiation index was calculated as the percentage of Myosin-positive cells out of the total cells. n=4, \*\*\*p<0.001.

### Supplementary Figure S3

**A**

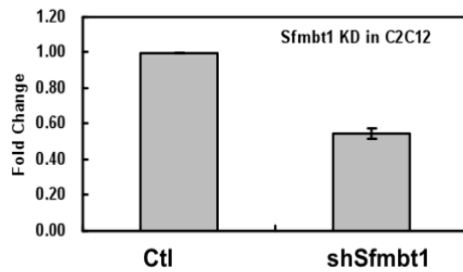

**B**

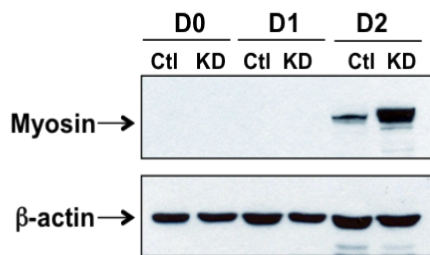

**Supplementary Figure S3. Knockdown of Sfmtb1 with an independent shRNA lentiviral construct (G2) in C2C12 myoblasts also resulted in enhanced differentiation.** (A) Real-time RT-PCR showed reduced expression level of Sfmtb1 in C2C12 knockdown cells (shSfmtb1) in comparison with the scramble shRNA control (Ctl). (B) Sfmtb1 knockdown C2C12 cells expressed increased level of the differentiation marker Myosin when induced differentiation.

Supplementary Figure S4

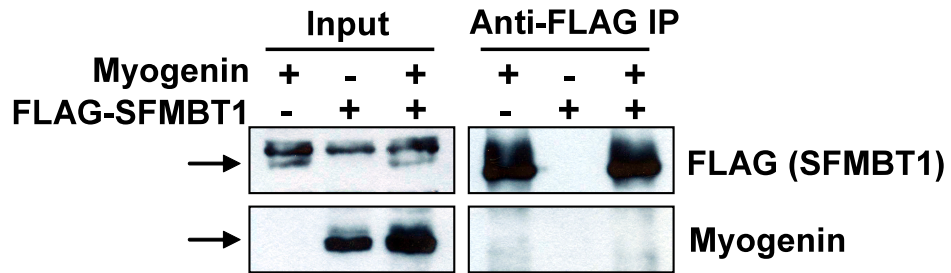

**Supplementary Figure S4. SFMBT1 failed to co-IP with Myogenin.** 293T cells were co-transfected with FLAG-SFMBT1 (pQCXIP-FLAG-SFMBT1) and Myogenin (pBabe-Myogenin) plasmids as indicated and the whole cell lysates were harvested 48 h after transfection. SFMBT1 IP was performed with anti-FLAG agaroses followed by Western blotting with indicated antibodies.

## Supplementary Figure S5

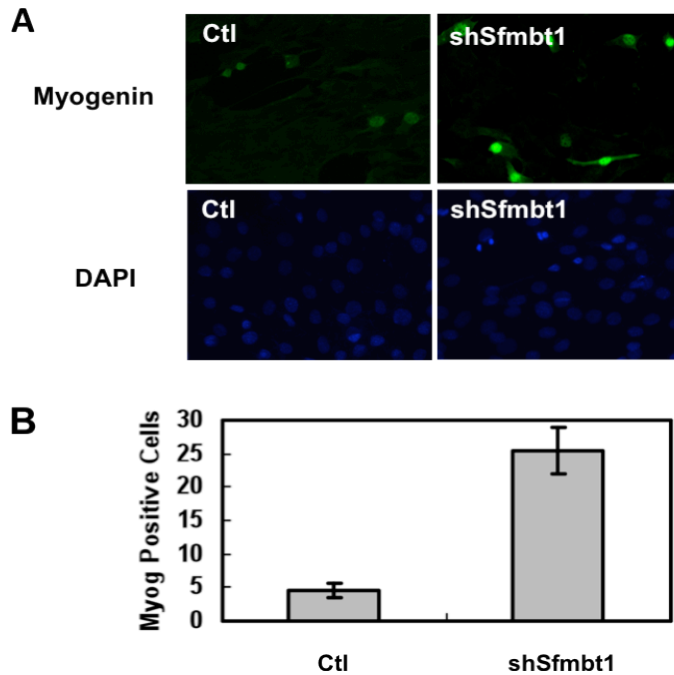

**Supplementary Figure S5. Sfmbt1 knockdown resulted in an increase in Myogenin-expressing cells.** (A) C2C12 myoblasts transduced with shCtl and shSfmbt1 lentiviruses were induced to undergo myogenic differentiation for 24 h. The cells were then stained using anti-Myogenin antibodies (green) and counter-stained with DAPI to label nuclei (blue). (B) The average number of Myogenin-positive cells in each field was presented. At least three independent fields were counted.

**Table S1. Primers used in this study were shown.**

| <b>Primers for gene expression</b>           |                        |                           |                      |
|----------------------------------------------|------------------------|---------------------------|----------------------|
| <b>Genes</b>                                 | <b>Forward primer</b>  | <b>Reverse primer</b>     | <b>Amplicon (bp)</b> |
| <b>Sfmbt1</b>                                | AGTGTGGCCGATGTCGTGCG   | GAGCAAAAGGGCCTGCCCCGT     | 99                   |
| <b>Myog</b>                                  | GTCCAACCCAGGAGATCATT   | GACGTAAGGGAGTGCAGATTGTG   | 70                   |
| <b>P21</b>                                   | CGGTGGAACCTTGACTTCGT   | CAGGGCAGAGGAAGTACTGG      | 159                  |
| <b>Pax7</b>                                  | AGGACGACGAGGAAGGAGACA  | TCATCCAGACGGTCCCTTT       | 100                  |
| <b>Mef2c</b>                                 | ACTGGGAAACCCCAATCTTC   | ATCAGACCGCCTGTGTTACC      | 111                  |
| <b>Mylpf</b>                                 | CGGACCCGGAGGATGTG      | TGGTGCCCTTCCCTTCTG        | 63                   |
| <b>Myh3</b>                                  | CAATAAACTGCGGGCAAAGAC  | CTTGCTCACTCCTCGCTTTCA     | 75                   |
| <b>Gas2</b>                                  | ACTTCTGCCCCATCTCCTT    | CTTGCAGGGAGGATCTTCAG      | 115                  |
| <b>Tnnc2</b>                                 | AAGAGGAACTGGCTGAGTGCTT | GCTAGCTCCTCAGCATCAATGTAG  | 73                   |
| <b>Gapdh</b>                                 | AACTTTGGGATTGTGGAAGG   | ACACATTGGGGGTAGGAACA      | 222                  |
| <b>Primers for CHIP</b>                      |                        |                           |                      |
| <b>Myog Pro</b>                              | GAATCACATGTAATCCACTGGA | ACGCCAACTGCTGGGTGCCA      | 151                  |
| <b>Primers for DNase I sensitivity assay</b> |                        |                           |                      |
| <b>Myog Pro</b>                              | GAATCACATGTAATCCACTGGA | GCTCCATCAGGTCGGAAAAGGCTTG | 201                  |

**Table S2. A list of genes showed up-regulated expression in Sfmbt1-knockdown C2C12 cells**

| probelD      | Gene Symbol | Gene Title                                                   | Fold-change | p-value | <sup>a</sup> MyoD Binding | <sup>a</sup> Distance to TSS (bp) |
|--------------|-------------|--------------------------------------------------------------|-------------|---------|---------------------------|-----------------------------------|
| 1452651_a_at | Myl1        | myosin, light polypeptide 1                                  | 7.20        | 0       | Yes                       | -2065                             |
| 1448371_at   | Mylpf       | myosin light chain, phosphorylatable, fast skeletal muscle   | 6.35        | 0       | Yes                       | -1120                             |
| 1427115_at   | Myh3        | myosin, heavy polypeptide 3, skeletal muscle, embryonic      | 5.18        | 0       | Yes                       | -710                              |
| 1427520_a_at | Myh1        | myosin, heavy polypeptide 1, skeletal muscle, adult          | 4.48        | 0       |                           |                                   |
| 1417464_at   | Tnnc2       | troponin C2, fast                                            | 4.06        | 0       | Yes                       | 1877                              |
| 1419391_at   | Myog        | myogenin                                                     | 4.02        | 0       | Yes                       | -17                               |
| 1448201_at   | Sfrp2       | secreted frizzled-related protein 2                          | 3.96        | 0       |                           |                                   |
| 1415927_at   | Actc1       | actin, alpha, cardiac muscle 1                               | 3.96        | 0       |                           |                                   |
| 1427735_a_at | Acta1       | actin, alpha 1, skeletal muscle                              | 3.83        | 0       | Yes                       | 3610                              |
| 1418370_at   | Tnnc1       | troponin C, cardiac/slow skeletal                            | 3.80        | 0       | Yes                       | -1612                             |
| 1418095_at   | Smpx        | small muscle protein, X-linked                               | 3.67        | 0       |                           |                                   |
| 1418072_at   | Hist1h2bc   | histone cluster 1, H2bc                                      | 3.62        | 0       |                           |                                   |
| 1450813_a_at | Tnni1       | troponin I, skeletal, slow 1                                 | 3.31        | 0       |                           |                                   |
| 1422580_at   | Myl4        | myosin, light polypeptide 4                                  | 3.09        | 0       | Yes                       | -164                              |
| 1419606_a_at | Tnnt1       | troponin T1, skeletal, slow                                  | 3.09        | 0       |                           |                                   |
| 1423606_at   | Postn       | periostin, osteoblast specific factor                        | 2.74        | 0       |                           |                                   |
| 1423669_at   | Col1a1      | collagen, type I, alpha 1                                    | 2.71        | 0       | Yes                       | 1184                              |
| 1455792_x_at | Ndn         | necdin                                                       | 2.54        | 0       |                           |                                   |
| 1416101_a_at | Hist1h1c    | histone cluster 1, H1c                                       | 2.51        | 0       | Yes                       | 38                                |
| 1418046_at   | Nap1l2      | nucleosome assembly protein 1-like 2                         | 2.49        | 0       | Yes                       | 2541                              |
| 1417185_at   | Ly6a        | lymphocyte antigen 6 complex, locus A                        | 2.46        | 0       | Yes                       | -1909                             |
| 1447657_s_at | Synpo2l     | synaptopodin 2-like                                          | 2.46        | 0       | Yes                       | 2538                              |
| 1454673_at   | Wasf2       | WAS protein family, member 2                                 | 2.41        | 0       | Yes                       | -660                              |
| 1434070_at   | Jag1        | jagged 1                                                     | 2.36        | 0       |                           |                                   |
| 1418209_a_at | Pfn2        | profilin 2                                                   | 2.35        | 0       | Yes                       | -3581                             |
| 1424780_a_at | Reep3       | receptor accessory protein 3                                 | 2.26        | 0       | Yes                       | 3357                              |
| 1426208_x_at | Plagl1      | pleiomorphic adenoma gene-like 1                             | 2.18        | 0       |                           |                                   |
| 1417399_at   | Gas6        | growth arrest specific 6                                     | 2.18        | 0       |                           |                                   |
| 1419123_a_at | Pdgfc       | platelet-derived growth factor, C polypeptide                | 2.17        | 0       | Yes                       | 611                               |
| 1433482_a_at | Fubp1       | far upstream element (FUSE) binding protein 1                | 2.15        | 0       | Yes                       | 420                               |
| 1421679_a_at | Cdkn1a      | cyclin-dependent kinase inhibitor 1A (P21)                   | 2.14        | 0.00392 | Yes                       | 2796                              |
| 1419050_at   | Tmem8c      | transmembrane protein 8C                                     | 2.13        | 0       |                           |                                   |
| 1426015_s_at | Asph        | aspartate-beta-hydroxylase                                   | 2.10        | 0       | Yes                       | -4438                             |
| 1419397_at   | Pola1       | polymerase (DNA directed), alpha 1                           | 2.10        | 0       |                           |                                   |
| 1416612_at   | Cyp1b1      | cytochrome P450, family 1, subfamily b, polypeptide 1        | 2.10        | 0       |                           |                                   |
| 1452540_a_at | Gm11277     | predicted gene 11277                                         | 2.09        | 0       |                           |                                   |
| 1422300_at   | Nog         | noggin                                                       | 2.08        | 0       | Yes                       | 1033                              |
| 1454838_s_at | Pkdcc       | protein kinase domain containing, cytoplasmic                | 2.06        | 0       |                           |                                   |
| 1441667_s_at | Smyd1       | SET and MYND domain containing 1                             | 2.06        | 0       |                           |                                   |
| 1426555_at   | Scpep1      | serine carboxypeptidase 1                                    | 2.02        | 0       |                           |                                   |
| 1416034_at   | Cd24a       | CD24a antigen                                                | 2.01        | 0       |                           |                                   |
| 1418603_at   | Avpr1a      | arginine vasopressin receptor 1A                             | 2.01        | 0       | Yes                       | 638                               |
| 1428891_at   | Parm1       | prostate androgen-regulated mucin-like protein 1             | 2.01        | 0.00002 | Yes                       | 6                                 |
| 1435274_at   | Spopl       | speckle-type POZ protein-like                                | 2.00        | 0.00003 |                           |                                   |
| 1417785_at   | Pla1a       | phospholipase A1 member A                                    | 1.99        | 0       |                           |                                   |
| 1452880_at   | Znhit3      | zinc finger, HIT type 3                                      | 1.99        | 0       |                           |                                   |
| 1433789_at   | Snhg3       | small nucleolar RNA host gene (non-protein coding) 3         | 1.98        | 0.00002 | Yes                       | 2861                              |
| 1450112_a_at | Gas2        | growth arrest specific 2                                     | 1.97        | 0       | Yes                       | 73                                |
| 1416953_at   | Ctgf        | connective tissue growth factor                              | 1.94        | 0       | Yes                       | 517                               |
| 1425476_at   | Col4a5      | collagen, type IV, alpha 5                                   | 1.93        | 0.00001 |                           |                                   |
| 1444061_at   | Prr9        | proline rich 9                                               | 1.93        | 0       |                           |                                   |
| 1455966_s_at | Nudt21      | nudix (nucleoside diphosphate linked moiety X)-type motif 21 | 1.92        | 0.01312 |                           |                                   |
| 1450387_s_at | Ak4         | adenylate kinase 4                                           | 1.92        | 0       |                           |                                   |
| 1444494_at   | Kbtbd10     | kelch repeat and BTB (POZ) domain containing 10              | 1.92        | 0       | Yes                       | -1485                             |
| 1427256_at   | Vcan        | versican                                                     | 1.90        | 0       |                           |                                   |
| 1436867_at   | Srl         | sarcalumenin                                                 | 1.89        | 0.00001 |                           |                                   |
| 1419487_at   | Mybph       | myosin binding protein H                                     | 1.88        | 0       | Yes                       | 1000                              |
| 1451341_s_at | Tmem189     | transmembrane protein 189                                    | 1.87        | 0       |                           |                                   |
| 1451989_a_at | Mapre2      | microtubule-associated protein, RP/EB family, member 2       | 1.87        | 0       | Yes                       | 89                                |
| 1434499_a_at | Ldhb        | lactate dehydrogenase B                                      | 1.86        | 0.00013 |                           |                                   |
| 1422644_at   | Sh3bgr      | SH3-binding domain glutamic acid-rich protein                | 1.85        | 0       |                           |                                   |

|              |            |                                                                                        |      |         |     |       |
|--------------|------------|----------------------------------------------------------------------------------------|------|---------|-----|-------|
| 1435355_at   | Neb        | nebulin                                                                                | 1.85 | 0       |     |       |
| 1450118_a_at | Tnnt3      | troponin T3, skeletal, fast                                                            | 1.84 | 0.00004 | Yes | 386   |
| 1416408_at   | Acox1      | acyl-Coenzyme A oxidase 1, palmitoyl                                                   | 1.84 | 0       | Yes | -3641 |
| 1450455_s_at | Akr1c12    | aldo-keto reductase family 1, member C12                                               | 1.83 | 0.00002 |     |       |
| 1434129_s_at | Lhfp12     | lipoma HMGIC fusion partner-like 2                                                     | 1.83 | 0       | Yes | 4773  |
| 1429459_at   | Sema3d     | sema domain, immunoglobulin domain (Ig), short basic domain, secreted, (semaphorin) 3D | 1.83 | 0.00001 | Yes | 193   |
|              | 1600012H06 |                                                                                        |      |         |     |       |
| 1428217_at   | Rik        | RIKEN cDNA 1600012H06 gene                                                             | 1.82 | 0       | Yes | -121  |
| 1449178_at   | Pdlim3     | PDZ and LIM domain 3                                                                   | 1.80 | 0       | Yes | -184  |
| 1421664_a_at | Styx       | serine/threonine/tyrosine interaction protein                                          | 1.79 | 0.00015 | Yes | -80   |
| 1421571_a_at | Ly6c1      | lymphocyte antigen 6 complex, locus C1                                                 | 1.78 | 0       |     |       |
| 1437288_at   | Impad1     | inositol monophosphatase domain containing 1                                           | 1.78 | 0.00002 |     |       |
| 1428125_at   | Atxn713b   | ataxin 7-like 3B                                                                       | 1.77 | 0       | Yes | 3683  |
| 1416666_at   | Serpine2   | serine (or cysteine) peptidase inhibitor, clade E, member 2                            | 1.77 | 0       |     |       |
| 1460208_at   | Fbn1       | fibrillin 1                                                                            | 1.77 | 0       | Yes | 3461  |
| 1454752_at   | Rbm24      | RNA binding motif protein 24                                                           | 1.77 | 0.00004 | Yes | 47    |
| 1416645_a_at | Afp        | alpha fetoprotein                                                                      | 1.76 | 0       |     |       |
| 1448664_a_at | Speg       | SPEG complex locus                                                                     | 1.75 | 0.00007 | Yes | -3728 |
| 1416498_at   | Ppic       | peptidylprolyl isomerase C                                                             | 1.74 | 0       |     |       |
| 1456035_at   | Nxf3       | nuclear RNA export factor 3                                                            | 1.74 | 0.00002 |     |       |
| 1452107_s_at | Npnt       | nephronectin                                                                           | 1.73 | 0.00001 |     |       |
| 1416680_at   | Ube3a      | ubiquitin protein ligase E3A                                                           | 1.73 | 0.00113 | Yes | 198   |
| 1447977_x_at | Gm14430    | predicted gene 14430                                                                   | 1.73 | 0.00001 |     |       |
| 1449133_at   | Sprr1a     | small proline-rich protein 1A                                                          | 1.73 | 0       | Yes | 2185  |
| 1439766_x_at | Vegfc      | vascular endothelial growth factor C                                                   | 1.72 | 0       | Yes | 240   |
| 1415897_a_at | Mgst1      | microsomal glutathione S-transferase 1                                                 | 1.72 | 0       |     |       |
| 1428083_at   | Neat1      | nuclear paraspeckle assembly transcript 1 (non-protein coding)                         | 1.72 | 0       | Yes | 141   |
| 1434549_at   | Rab11a     | RAB11a, member RAS oncogene family                                                     | 1.72 | 0       |     |       |
| 1451348_at   | Depdc6     | DEP domain containing 6                                                                | 1.72 | 0.00003 | Yes | 207   |
| 1422606_at   | C1qtnf3    | C1q and tumor necrosis factor related protein 3                                        | 1.71 | 0       | Yes | -48   |
| 1451475_at   | Plxnd1     | plexin D1                                                                              | 1.71 | 0       | Yes | 1036  |
| 1433676_at   | Wnk1       | WNK lysine deficient protein kinase 1                                                  | 1.71 | 0       |     |       |
|              | 1110021L09 |                                                                                        |      |         |     |       |
| 1428795_at   | Rik        | RIKEN cDNA 1110021L09 gene                                                             | 1.70 | 0       |     |       |
| 1460430_at   | Rap2c      | RAP2C, member of RAS oncogene family                                                   | 1.70 | 0       |     |       |
|              | 2610528A11 |                                                                                        |      |         |     |       |
| 1435639_at   | Rik        | RIKEN cDNA 2610528A11 gene                                                             | 1.70 | 0.00001 |     |       |
| 1449118_at   | Dbt        | dihydrolipoamide branched chain transacylase E2                                        | 1.69 | 0.00002 | Yes | 63    |
| 1436944_x_at | Pisd-ps1   | phosphatidylserine decarboxylase, pseudogene 1                                         | 1.68 | 0       | Yes | 92    |
| 1433730_at   | Elmod2     | ELMO domain containing 2                                                               | 1.68 | 0       |     |       |
| 1436534_at   | Trove2     | TROVE domain family, member 2                                                          | 1.68 | 0.00001 |     |       |
| 1436935_x_at | Clns1a     | chloride channel, nucleotide-sensitive, 1A                                             | 1.67 | 0       |     |       |
| 1420642_a_at | Romo1      | reactive oxygen species modulator 1                                                    | 1.67 | 0.00001 | Yes | 323   |
| 1421027_a_at | Mef2c      | myocyte enhancer factor 2C                                                             | 1.67 | 0.0002  | Yes | 121   |
| 1450922_a_at | Tgfb2      | transforming growth factor, beta 2                                                     | 1.67 | 0       |     |       |
| 1448152_at   | Igf2       | insulin-like growth factor 2                                                           | 1.66 | 0       |     |       |
| 1417644_at   | Sspn       | sarcospan                                                                              | 1.66 | 0.00001 | Yes | 117   |
| 1457435_x_at | Myom2      | myomesin 2                                                                             | 1.65 | 0       | Yes | 2480  |
| 1448933_at   | Pcdhb17    | protocadherin beta 17                                                                  | 1.65 | 0.00001 |     |       |
| 1434411_at   | Col12a1    | collagen, type XII, alpha 1                                                            | 1.65 | 0       |     |       |
|              | 2010107H07 |                                                                                        |      |         |     |       |
| 1456204_at   | Rik        | RIKEN cDNA 2010107H07 gene                                                             | 1.63 | 0       |     |       |
| 1455184_at   | Mobk1a     | MOB1, Mps One Binder kinase activator-like 1A (yeast)                                  | 1.63 | 0       |     |       |
| 1416911_a_at | Akirin1    | akirin 1                                                                               | 1.63 | 0.00002 |     |       |
| 1420858_at   | Pkia       | protein kinase inhibitor, alpha                                                        | 1.63 | 0       | Yes | 38    |
| 1437845_x_at | Pofut2     | protein O-fucosyltransferase 2                                                         | 1.62 | 0       |     |       |
|              | 1110007C09 |                                                                                        |      |         |     |       |
| 1431359_a_at | Rik        | RIKEN cDNA 1110007C09 gene                                                             | 1.62 | 0       |     |       |
| 1452237_at   | Arfg1      | ArfGAP with FG repeats 1                                                               | 1.62 | 0       | Yes | -91   |
| 1452893_s_at | Enho       | energy homeostasis associated                                                          | 1.62 | 0       | Yes | 3266  |
| 1422520_at   | Nefm       | neurofilament, medium polypeptide                                                      | 1.62 | 0       | Yes | 4966  |
| 1418308_at   | Hus1       | Hus1 homolog (S. pombe)                                                                | 1.61 | 0       |     |       |
| 1420608_at   | Rbm18      | RNA binding motif protein 18                                                           | 1.61 | 0       |     |       |
| 1423287_at   | Cbln1      | cerebellin 1 precursor protein                                                         | 1.61 | 0.00003 | Yes | 3698  |
| 1418304_at   | Cdhr1      | cadherin-related family member 1                                                       | 1.61 | 0.00003 |     |       |



|              |            |                                                                                                                 |         |         |      |       |
|--------------|------------|-----------------------------------------------------------------------------------------------------------------|---------|---------|------|-------|
| 1460656_a_at | Sft2d1     | SFT2 domain containing 1                                                                                        | 1.61    | 0       |      |       |
| 1434552_at   | Wdr77      | WD repeat domain 77                                                                                             | 1.61    | 0.00001 |      |       |
| 1421858_at   | Adam17     | a disintegrin and metallopeptidase domain 17                                                                    | 1.61    | 0       |      |       |
| 1449410_a_at | Gas5       | growth arrest specific 5                                                                                        | 1.60    | 0       |      |       |
| 1451412_a_at | Ift20      | intraflagellar transport 20 homolog (Chlamydomonas)                                                             | 1.60    | 0.00055 | Yes  | -881  |
| 1426852_x_at | Nov        | nephroblastoma overexpressed gene                                                                               | 1.60    | 0.00005 |      |       |
| 1435524_at   | Snhg8      | small nucleolar RNA host gene 8                                                                                 | 1.60    | 0.00002 |      |       |
| 1418004_a_at | Tmem176b   | transmembrane protein 176B<br>asparagine-linked glycosylation 11 homolog (yeast, alpha-1,2-mannosyltransferase) | 1.60    | 0.00011 |      |       |
| 1434187_at   | Alg11      | 1.60                                                                                                            | 0.00011 | Yes     | -167 |       |
| 1448875_at   | Zhx1       | zinc fingers and homeoboxes 1                                                                                   | 1.60    | 0.00001 |      |       |
| 1418973_at   | Blzf1      | basic leucine zipper nuclear factor 1                                                                           | 1.59    | 0       |      |       |
| 1448124_at   | Gusb       | glucuronidase, beta                                                                                             | 1.59    | 0       |      |       |
| 1453851_a_at | Gadd45g    | growth arrest and DNA-damage-inducible 45 gamma                                                                 | 1.59    | 0       | Yes  | -48   |
| 1449929_at   | Dyntl3     | dynein light chain Tctex-type 3                                                                                 | 1.59    | 0       |      |       |
| 1425603_at   | Tmem176a   | transmembrane protein 176A                                                                                      | 1.59    | 0.00017 |      |       |
| 1436361_at   | Vgll2      | vestigial like 2 homolog (Drosophila)                                                                           | 1.59    | 0.00002 | Yes  | -6    |
| 1448961_at   | Plscr2     | phospholipid scramblase 2                                                                                       | 1.58    | 0.00052 |      |       |
| 1436387_at   | Homer1     | homer homolog 1 (Drosophila)                                                                                    | 1.58    | 0       | Yes  | -894  |
| 1459981_s_at | Rsbm1      | rosbin, round spermatid basic protein 1                                                                         | 1.58    | 0.00005 | Yes  | -228  |
| 1436210_at   | Gk5        | glycerol kinase 5 (putative)                                                                                    | 1.58    | 0.00027 |      |       |
| 1420875_at   | Twf1       | twinfilin, actin-binding protein, homolog 1 (Drosophila)                                                        | 1.58    | 0       | Yes  | -2839 |
| 1419662_at   | Ogn        | osteoglycin                                                                                                     | 1.57    | 0.00004 | Yes  | -208  |
| 1436319_at   | Sulf1      | sulfatase 1                                                                                                     | 1.57    | 0.00005 | Yes  | -283  |
| 1447967_at   | Tmem69     | transmembrane protein 69                                                                                        | 1.57    | 0.00221 |      |       |
| 1437466_at   | Alcam      | activated leukocyte cell adhesion molecule                                                                      | 1.57    | 0.00001 |      |       |
| 1460125_at   | Ccdc141    | coiled-coil domain containing 141                                                                               | 1.57    | 0.00074 |      |       |
| 1428277_at   | Otud6b     | OTU domain containing 6B                                                                                        | 1.56    | 0       |      |       |
| 1416318_at   | Serpnb1a   | serine (or cysteine) peptidase inhibitor, clade B, member 1a                                                    | 1.56    | 0       |      |       |
| 1437409_s_at | Gpr126     | G protein-coupled receptor 126                                                                                  | 1.56    | 0.00001 |      |       |
| 1424567_at   | Tspan2     | tetraspanin 2                                                                                                   | 1.56    | 0.00013 | Yes  | 83    |
| 1427446_s_at | Ttn        | titin                                                                                                           | 1.56    | 0.00005 |      |       |
|              | 2610306M01 |                                                                                                                 |         |         |      |       |
| 1452988_at   | Rik        | RIKEN cDNA 2610306M01 gene                                                                                      | 1.56    | 0.0002  | Yes  | 1093  |
| 1434479_at   | Col5a1     | collagen, type V, alpha 1                                                                                       | 1.56    | 0       | Yes  | 112   |
| 1440559_at   | Hmga2-ps1  | high mobility group AT-hook 2, pseudogene 1                                                                     | 1.56    | 0.00002 |      |       |
| 1452352_at   | Ctla2b     | cytotoxic T lymphocyte-associated protein 2 beta                                                                | 1.55    | 0.00166 |      |       |
| 1459850_x_at | Glrb       | glycine receptor, beta subunit                                                                                  | 1.55    | 0.00003 |      |       |
| 1416985_at   | Sirpa      | signal-regulatory protein alpha                                                                                 | 1.55    | 0.00001 |      |       |
| 1450625_at   | Col5a2     | collagen, type V, alpha 2                                                                                       | 1.55    | 0.00001 |      |       |
| 1439364_a_at | Mmp2       | matrix metallopeptidase 2                                                                                       | 1.55    | 0.00001 |      |       |
| 1456739_x_at | Armxc2     | armadillo repeat containing, X-linked 2                                                                         | 1.55    | 0.00004 |      |       |
| 1416735_at   | Asah1      | N-acylsphingosine amidohydrolase 1                                                                              | 1.55    | 0       |      |       |
| 1423110_at   | Col1a2     | collagen, type I, alpha 2                                                                                       | 1.55    | 0       | Yes  | 1791  |
| 1424289_at   | Osgin2     | oxidative stress induced growth inhibitor family member 2                                                       | 1.55    | 0       | Yes  | -1317 |
|              | 1110067D22 |                                                                                                                 |         |         |      |       |
| 1451313_a_at | Rik        | RIKEN cDNA 1110067D22 gene                                                                                      | 1.54    | 0.00002 |      |       |
| 1455316_x_at | BC094435   | cDNA sequence BC094435                                                                                          | 1.54    | 0       |      |       |
| 1448269_a_at | Klhl13     | kelch-like 13 (Drosophila)                                                                                      | 1.54    | 0.00022 |      |       |
| 1435713_at   | Mettl2     | methyltransferase like 2                                                                                        | 1.54    | 0.00004 |      |       |
| 1439606_at   | Katnal1    | katanin p60 subunit A-like 1                                                                                    | 1.53    | 0.00007 |      |       |
| 1418417_at   | Msc        | musculin                                                                                                        | 1.53    | 0.00012 | Yes  | 2139  |
| 1453304_s_at | Ly6e       | lymphocyte antigen 6 complex, locus E                                                                           | 1.53    | 0.00001 | Yes  | 557   |
| 1415863_at   | Eif4g2     | eukaryotic translation initiation factor 4, gamma 2                                                             | 1.53    | 0.00001 |      |       |
| 1423309_at   | Tgoln1     | trans-golgi network protein                                                                                     | 1.53    | 0.00003 |      |       |
| 1437016_x_at | Rap2c      | RAP2C, member of RAS oncogene family                                                                            | 1.53    | 0       |      |       |
| 1455070_at   | Dcp2       | DCP2 decapping enzyme homolog (S. cerevisiae)                                                                   | 1.53    | 0.00002 |      |       |
| 1433887_at   | Dnajc3     | DnaJ (Hsp40) homolog, subfamily C, member 3                                                                     | 1.53    | 0.00001 |      |       |
| 1417273_at   | Pdk4       | pyruvate dehydrogenase kinase, isoenzyme 4                                                                      | 1.53    | 0.00001 |      |       |
| 1421217_a_at | Lgals9     | lectin, galactose binding, soluble 9                                                                            | 1.53    | 0       |      |       |
| 1455121_at   | Lcor       | ligand dependent nuclear receptor corepressor                                                                   | 1.52    | 0.00005 |      |       |
| 1428103_at   | Adam10     | a disintegrin and metallopeptidase domain 10                                                                    | 1.52    | 0.00001 | Yes  | -327  |
| 1433864_at   | Lrp12      | low density lipoprotein-related protein 12                                                                      | 1.52    | 0.00008 |      |       |
| 1428715_at   | Gfpt1      | glutamine fructose-6-phosphate transaminase 1                                                                   | 1.52    | 0       |      |       |
| 1417675_a_at | Mdn1       | midasin homolog (yeast)                                                                                         | 1.52    | 0       |      |       |
| 1422668_at   | Serpnb9b   | serine (or cysteine) peptidase inhibitor, clade B, member 9b                                                    | 1.52    | 0       | Yes  | 876   |

|              |          |                                                           |      |         |     |       |
|--------------|----------|-----------------------------------------------------------|------|---------|-----|-------|
| 1441994_at   | Pcdhb16  | protocadherin beta 16                                     | 1.52 | 0.00025 |     |       |
| 1416432_at   | Pfkfb3   | 6-phosphofructo-2-kinase/fructose-2,6-biphosphatase 3     | 1.52 | 0.00001 |     |       |
| 1452214_at   | Skil     | SKI-like                                                  | 1.52 | 0       | Yes | -607  |
| 1419220_at   | Xirp1    | xin actin-binding repeat containing 1                     | 1.52 | 0.0009  | Yes | -67   |
| 1448706_at   | Tdp2     | tyrosyl-DNA phosphodiesterase 2                           | 1.52 | 0.00002 |     |       |
| 1424215_at   | Fundc1   | FUN14 domain containing 1                                 | 1.51 | 0.00001 |     |       |
| 1427306_at   | Ryr1     | ryanodine receptor 1, skeletal muscle                     | 1.51 | 0.00072 | Yes | -2371 |
| 1448593_at   | Wisp1    | WNT1 inducible signaling pathway protein 1                | 1.51 | 0.00509 | Yes | 223   |
| 1416427_at   | Ccni     | cyclin I                                                  | 1.51 | 0.00002 |     |       |
| 1442348_at   | Katnal1  | katanin p60 subunit A-like 1                              | 1.51 | 0.00012 |     |       |
| 1440815_x_at | Gm8267   | predicted gene 8267                                       | 1.51 | 0.0002  |     |       |
| 1433924_at   | Peg3     | paternally expressed 3                                    | 1.51 | 0.00001 |     |       |
| 1433502_s_at | Tsr1     | TSR1, 20S rRNA accumulation, homolog (yeast)              | 1.51 | 0.00002 | Yes | -682  |
| 1441315_s_at | Slc19a2  | solute carrier family 19 (thiamine transporter), member 2 | 1.51 | 0.00012 |     |       |
| 1416907_at   | Tsn      | translin                                                  | 1.51 | 0.00004 |     |       |
| 1426570_a_at | Frk      | fyn-related kinase                                        | 1.51 | 0.00088 | Yes | -444  |
| 1457825_x_at | Tcn2     | transcobalamin 2                                          | 1.51 | 0       | Yes | -2388 |
| 1428899_at   | Tmem182  | transmembrane protein 182                                 | 1.51 | 0.00046 |     |       |
| 1417254_at   | Spata5   | spermatogenesis associated 5                              | 1.51 | 0.00035 | Yes | -552  |
| 1436736_x_at | D0H4S114 | DNA segment, human D4S114                                 | 1.50 | 0.00071 |     |       |
| 1430034_at   | Cct4     | chaperonin containing Tcp1, subunit 4 (delta)             | 1.50 | 0.00003 | Yes | -46   |
| 1448237_x_at | Ldhd     | lactate dehydrogenase B                                   | 1.50 | 0.00001 |     |       |

<sup>a</sup>: MyoD binding analysis based on the MyoD ChIP-Seq data (SRA: SRX016191) in undifferentiated C2C12 myoblast [Cao Y. et.al. *Dev Cell*. 2010 ], genes with MyoD binding in promoter region (+/- 5000bp to TSS) are defined as direct MyoD targets

**Table S3. A list of genes showed down-regulated expression in Sfbmt1-knockdown C2C12 cells**

| probeID      | Gene Symbol | Gene Title                                                                | Fold-change | p-value |
|--------------|-------------|---------------------------------------------------------------------------|-------------|---------|
| 1418188_a_at | Malat1      | metastasis associated lung adenocarcinoma transcript 1 (non-coding RNA)   | -3.77       | 0.00018 |
| 1448747_at   | Fbxo32      | F-box protein 32                                                          | -3.34       | 0       |
| 1451020_at   | Gsk3b       | glycogen synthase kinase 3 beta                                           | -3.33       | 0       |
| 1420908_at   | Cd2ap       | CD2-associated protein                                                    | -3.31       | 0       |
| 1448733_at   | Bmi1        | Bmi1 polycomb ring finger oncogene                                        | -3.26       | 0       |
| 1437554_at   | Plec        | plectin                                                                   | -3.24       | 0.00004 |
| 1453997_a_at | Nes         | nestin                                                                    | -3.17       | 0.00003 |
| 1425357_a_at | Grem1       | gremlin 1                                                                 | -2.85       | 0.00001 |
| 1416200_at   | Il33        | interleukin 33                                                            | -2.83       | 0       |
| 1451071_a_at | Atp1a1      | ATPase, Na <sup>+</sup> /K <sup>+</sup> transporting, alpha 1 polypeptide | -2.82       | 0       |
| 1417403_at   | Elovl6      | ELOVL family member 6, elongation of long chain fatty acids (yeast)       | -2.77       | 0       |
| 1419459_a_at | Magt1       | magnesium transporter 1                                                   | -2.65       | 0       |
| 1450651_at   | Myo10       | myosin X                                                                  | -2.54       | 0       |
| 1450051_at   | Atrx        | alpha thalassemia/mental retardation syndrome X-linked homolog (human)    | -2.50       | 0.00013 |
| 1452670_at   | Myl9        | myosin, light polypeptide 9, regulatory                                   | -2.49       | 0       |
| 1429434_at   | Pik3ca      | phosphatidylinositol 3-kinase, catalytic, alpha polypeptide               | -2.47       | 0       |
| 1448525_a_at | Bnip3l      | BCL2/adenovirus E1B interacting protein 3-like                            | -2.43       | 0       |
| 1457281_at   | Dnajc21     | DnaJ (Hsp40) homolog, subfamily C, member 21                              | -2.39       | 0       |
| 1436343_at   | Chd4        | chromodomain helicase DNA binding protein 4                               | -2.36       | 0.00002 |
| 1415802_at   | Slc16a1     | solute carrier family 16 (monocarboxylic acid transporters), member 1     | -2.35       | 0       |
| 1439122_at   | Ddx6        | DEAD (Asp-Glu-Ala-Asp) box polypeptide 6                                  | -2.34       | 0.00001 |
| 1436158_at   | Eif4ebp2    | eukaryotic translation initiation factor 4E binding protein 2             | -2.27       | 0       |
| 1455102_at   | Larp4       | La ribonucleoprotein domain family, member 4                              | -2.24       | 0       |
| 1439037_at   | Ddx17       | DEAD (Asp-Glu-Ala-Asp) box polypeptide 17                                 | -2.22       | 0       |
| 1458802_at   | Hivp3       | human immunodeficiency virus type I enhancer binding protein 3            | -2.22       | 0       |
| 1450071_at   | Ash1l       | ash1 (absent, small, or homeotic)-like (Drosophila)                       | -2.19       | 0       |
| 1423154_at   | BC005537    | cDNA sequence BC005537                                                    | -2.18       | 0       |
| 1451100_a_at | Cdv3        | carnitine deficiency-associated gene expressed in ventricle 3             | -2.18       | 0       |
| 1458385_at   | Hspa4l      | heat shock protein 4 like                                                 | -2.17       | 0       |
| 1424572_a_at | H2afy       | H2A histone family, member Y                                              | -2.17       | 0       |
| 1458226_at   | Flnb        | filamin, beta                                                             | -2.15       | 0       |
| 1423501_at   | Max         | Max protein                                                               | -2.13       | 0.00018 |
| 1453504_at   | Taf15       | TAF15 RNA polymerase II, TATA box binding protein (TBP)-associated factor | -2.13       | 0       |
| 1429658_a_at | Smc2        | structural maintenance of chromosomes 2                                   | -2.12       | 0.00006 |
| 1438833_at   | Casc5       | cancer susceptibility candidate 5                                         | -2.11       | 0.00393 |
| 1427488_a_at | Birc6       | baculoviral IAP repeat-containing 6                                       | -2.11       | 0.00017 |
| 1422894_at   | Sfbmt1      | Scm-like with four mbt domains 1                                          | -2.11       | 0       |
| 1436188_a_at | Ndrp4       | N-myc downstream regulated gene 4                                         | -2.09       | 0       |
| 1450767_at   | Nedd9       | neural precursor cell expressed, developmentally down-regulated gene 9    | -2.09       | 0       |
| 1427067_at   | Rik         | RIKEN cDNA 4933439F18 gene                                                | -2.08       | 0       |
| 1417623_at   | Slc12a2     | solute carrier family 12, member 2                                        | -2.06       | 0.00004 |
| 1423249_at   | Nktr        | natural killer tumor recognition sequence                                 | -2.04       | 0.00042 |
| 1460729_at   | Rock1       | Rho-associated coiled-coil containing protein kinase 1                    | -2.04       | 0       |
| 1435265_at   | 98          | hypothetical LOC100504698                                                 | -2.03       | 0       |
| 1431254_at   | Kbtbd11     | kelch repeat and BTB (POZ) domain containing 11                           | -2.02       | 0       |
| 1421431_at   | Ptrf        | polymerase I and transcript release factor                                | -2.02       | 0       |
| 1416555_at   | Ei24        | etoposide induced 2.4 mRNA                                                | -2.02       | 0       |
| 1449311_at   | Bach1       | BTB and CNC homology 1                                                    | -2.02       | 0       |
| 1442367_at   | Atp11c      | ATPase, class VI, type 11C                                                | -2.01       | 0.00002 |
| 1424768_at   | Cald1       | caldesmon 1                                                               | -2.01       | 0       |
| 1419055_a_at | Ptpn21      | protein tyrosine phosphatase, non-receptor type 21                        | -2.00       | 0.00001 |
| 1438201_at   | Pdp1        | pyruvate dehydrogenase phosphatase catalytic subunit 1                    | -2.00       | 0       |
| 1441897_at   | Rik         | RIKEN cDNA B230120H23 gene                                                | -2.00       | 0.00002 |
| 1417719_at   | Sap30       | sin3 associated polypeptide                                               | -1.99       | 0       |
| 1426892_at   | Utrn        | utrophin                                                                  | -1.99       | 0.00048 |
| 1422490_at   | Bnip2       | BCL2/adenovirus E1B interacting protein 2                                 | -1.98       | 0       |
| 1456361_at   | Afap1       | actin filament associated protein 1                                       | -1.98       | 0.00365 |
| 1451437_at   | Zdhhc20     | zinc finger, DHHC domain containing 20                                    | -1.97       | 0.00002 |
| 1418043_at   | Abcc5       | ATP-binding cassette, sub-family C (CFTR/MRP), member 5                   | -1.97       | 0.00007 |
| 1454769_at   | Tatdn2      | TatD DNase domain containing 2                                            | -1.95       | 0       |
| 1419037_at   | Csnk2a1     | casein kinase 2, alpha 1 polypeptide                                      | -1.95       | 0.00741 |

|              |            |                                                                                                                             |       |         |
|--------------|------------|-----------------------------------------------------------------------------------------------------------------------------|-------|---------|
| 1427414_at   | Prkar2a    | protein kinase, cAMP dependent regulatory, type II alpha                                                                    | -1.94 | 0       |
| 1431395_a_at | Iqgap1     | IQ motif containing GTPase activating protein 1                                                                             | -1.94 | 0.00003 |
| 1451458_at   | Tmem2      | transmembrane protein 2                                                                                                     | -1.93 | 0       |
|              | 2410089E03 |                                                                                                                             |       |         |
| 1443691_at   | Rik        | RIKEN cDNA 2410089E03 gene                                                                                                  | -1.93 | 0.00004 |
| 1452942_at   | Tmem65     | transmembrane protein 65                                                                                                    | -1.93 | 0       |
| 1449292_at   | Rb1cc1     | RB1-inducible coiled-coil 1                                                                                                 | -1.92 | 0.0004  |
| 1438160_x_at | Slco4a1    | solute carrier organic anion transporter family, member 4a1                                                                 | -1.92 | 0       |
| 1438686_at   | Eif4g1     | eukaryotic translation initiation factor 4, gamma 1                                                                         | -1.92 | 0.00107 |
| 1424254_at   | Ifitm1     | interferon induced transmembrane protein 1                                                                                  | -1.90 | 0       |
| 1427267_at   | Tnrc18     | trinucleotide repeat containing 18                                                                                          | -1.90 | 0.00046 |
| 1416524_at   | Spop       | speckle-type POZ protein                                                                                                    | -1.90 | 0       |
| 1424708_at   | Tmed10     | transmembrane emp24-like trafficking protein 10 (yeast)                                                                     | -1.89 | 0       |
| 1455998_at   | Zbed6      | zinc finger, BED domain containing 6                                                                                        | -1.89 | 0.00027 |
|              |            | nucleus accumbens associated 1, BEN and BTB (POZ) domain containing                                                         |       |         |
| 1433140_a_at | Nacc1      |                                                                                                                             | -1.89 | 0       |
| 1416253_at   | Cdkn2d     | cyclin-dependent kinase inhibitor 2D (p19, inhibits CDK4)                                                                   | -1.89 | 0       |
| 1416572_at   | Mmp14      | matrix metalloproteinase 14 (membrane-inserted)                                                                             | -1.88 | 0.00001 |
|              |            | sema domain, seven thrombospondin repeats (type 1 and type 1-like), transmembrane domain (TM) and short cytoplasmic domain, |       |         |
| 1437422_at   | Sema5a     | (semaphorin) 5A                                                                                                             | -1.88 | 0       |
| 1442802_x_at | Bat2       | HLA-B associated transcript 2                                                                                               | -1.88 | 0.00002 |
| 1458447_at   | Cenpf      | centromere protein F                                                                                                        | -1.88 | 0.00002 |
| 1436954_at   | Wipf1      | WAS/WASL interacting protein family, member 1                                                                               | -1.87 | 0       |
| 1419728_at   | Cxcl5      | chemokine (C-X-C motif) ligand 5                                                                                            | -1.87 | 0.00004 |
| 1432164_a_at | Gcsh       | glycine cleavage system protein H (aminomethyl carrier)                                                                     | -1.87 | 0       |
| 1418573_a_at | Raly       | hnRNP-associated with lethal yellow                                                                                         | -1.86 | 0.0002  |
| 1423241_a_at | Tfdp1      | transcription factor Dp 1                                                                                                   | -1.86 | 0       |
| 1460498_a_at | Dnajc5     | DnaJ (Hsp40) homolog, subfamily C, member 5                                                                                 | -1.85 | 0.00002 |
| 1436223_at   | Itgb8      | integrin beta 8                                                                                                             | -1.85 | 0       |
| 1435184_at   | Npr3       | natriuretic peptide receptor 3                                                                                              | -1.84 | 0       |
| 1452292_at   | Ap2b1      | adaptor-related protein complex 2, beta 1 subunit                                                                           | -1.84 | 0.00109 |
| 1424025_at   | BC013529   | cDNA sequence BC013529                                                                                                      | -1.84 | 0       |
|              |            | SWI/SNF related, matrix associated, actin dependent regulator of chromatin, subfamily a, member 5                           |       |         |
| 1424207_at   | Smarca5    |                                                                                                                             | -1.83 | 0.00001 |
| 1423184_at   | Itns2      | intersectin 2                                                                                                               | -1.83 | 0.00035 |
| 1432349_a_at | Sync       | syncoilin                                                                                                                   | -1.81 | 0.00289 |
| 1438771_at   | Brd1       | bromodomain containing 1                                                                                                    | -1.81 | 0.00041 |
| 1425166_at   | Rbl1       | retinoblastoma-like 1 (p107)                                                                                                | -1.81 | 0.00006 |
| 1421453_at   | Jph2       | junctophilin 2                                                                                                              | -1.81 | 0       |
| 1422910_s_at | Smc6       | structural maintenance of chromosomes 6                                                                                     | -1.80 | 0.00012 |
| 1443832_s_at | Sdpr       | serum deprivation response                                                                                                  | -1.79 | 0.00001 |
| 1429172_a_at | Ncapg      | non-SMC condensin I complex, subunit G                                                                                      | -1.79 | 0.00001 |
| 1416154_at   | Srp54a     | signal recognition particle 54A                                                                                             | -1.78 | 0.00035 |
|              |            | elongation of very long chain fatty acids (FEN1/Elo2, SUR4/Elo3, yeast)-like 4                                              |       |         |
| 1424306_at   | Elovl4     |                                                                                                                             | -1.78 | 0       |
| 1438246_at   | Csnk1g1    | casein kinase 1, gamma 1                                                                                                    | -1.78 | 0.00015 |
| 1419416_a_at | Rarg       | retinoic acid receptor, gamma                                                                                               | -1.78 | 0       |
| 1450035_a_at | Prpf40a    | PRP40 pre-mRNA processing factor 40 homolog A (yeast)                                                                       | -1.78 | 0.00005 |
| 1430216_at   | Zfp292     | zinc finger protein 292                                                                                                     | -1.78 | 0.00069 |
| 1415988_at   | Hdlbp      | high density lipoprotein (HDL) binding protein                                                                              | -1.78 | 0       |
| 1436970_a_at | Pdgfrb     | platelet derived growth factor receptor, beta polypeptide                                                                   | -1.78 | 0       |
| 1431213_a_at | Gm3579     | predicted gene 3579                                                                                                         | -1.77 | 0       |
| 1418911_s_at | Acsl4      | acyl-CoA synthetase long-chain family member 4                                                                              | -1.77 | 0       |
| 1433960_at   | Isg20l2    | interferon stimulated exonuclease gene 20-like 2                                                                            | -1.77 | 0       |
| 1449325_at   | Fads2      | fatty acid desaturase 2                                                                                                     | -1.77 | 0       |
| 1421032_a_at | Dnajb12    | DnaJ (Hsp40) homolog, subfamily B, member 12                                                                                | -1.76 | 0.00004 |
| 1424077_at   | Gdpd1      | glycerophosphodiester phosphodiesterase domain containing 1                                                                 | -1.76 | 0       |
| 1427688_a_at | Ptprs      | protein tyrosine phosphatase, receptor type, S                                                                              | -1.76 | 0       |
| 1427665_a_at | Nfic       | nuclear factor I/C                                                                                                          | -1.76 | 0.00376 |
| 1418127_a_at | Aifm1      | apoptosis-inducing factor, mitochondrion-associated 1                                                                       | -1.76 | 0       |
| 1433719_at   | Slc9a9     | solute carrier family 9 (sodium/hydrogen exchanger), member 9                                                               | -1.75 | 0       |
| 1429432_at   | Bat2l2     | HLA-B associated transcript 2-like 2                                                                                        | -1.75 | 0.00014 |
| 1441520_at   | Aspm       | asp (abnormal spindle)-like, microcephaly associated (Drosophila)                                                           | -1.75 | 0.00032 |
| 1449556_at   | H2-T23     | histocompatibility 2, T region locus 23                                                                                     | -1.75 | 0       |
|              | 1110001A16 |                                                                                                                             |       |         |
| 1435755_at   | Rik        | RIKEN cDNA 1110001A16 gene                                                                                                  | -1.75 | 0.00001 |
| 1422571_at   | Thbs2      | thrombospondin 2                                                                                                            | -1.75 | 0       |
| 1417978_at   | Eif4e3     | eukaryotic translation initiation factor 4E member 3                                                                        | -1.74 | 0.00001 |
| 1455034_at   | Nr4a2      | nuclear receptor subfamily 4, group A, member 2                                                                             | -1.74 | 0.00002 |
| 1459869_x_at | Pdpr       | pyruvate dehydrogenase phosphatase regulatory subunit                                                                       | -1.73 | 0       |
| 1456110_at   | Ankrd11    | ankyrin repeat domain 11                                                                                                    | -1.73 | 0.00058 |

|              |         |                                                                                  |       |         |
|--------------|---------|----------------------------------------------------------------------------------|-------|---------|
| 1443923_at   | Akap13  | A kinase (PRKA) anchor protein 13                                                | -1.73 | 0.00074 |
| 1444319_at   | E2f8    | E2F transcription factor 8                                                       | -1.73 | 0.00001 |
| 1427764_a_at | Tcf3    | transcription factor 3                                                           | -1.73 | 0       |
| 1448623_at   | Tmem123 | transmembrane protein 123                                                        | -1.73 | 0       |
| 1425014_at   | Nr2c2   | nuclear receptor subfamily 2, group C, member 2                                  | -1.72 | 0       |
| 1442072_at   | Rik     | RIKEN cDNA C230081A13 gene                                                       | -1.72 | 0.00001 |
| 1422313_a_at | Igfbp5  | insulin-like growth factor binding protein 5                                     | -1.72 | 0       |
| 1434601_at   | Amigo2  | adhesion molecule with Ig like domain 2                                          | -1.72 | 0.00001 |
| 1456503_at   | Nup214  | nucleoporin 214                                                                  | -1.71 | 0.00009 |
| 1452722_a_at | Cul5    | cullin 5                                                                         | -1.71 | 0.00009 |
| 1426255_at   | Nefl    | neurofilament, light polypeptide                                                 | -1.71 | 0       |
| 1418288_at   | Lpin1   | lipin 1                                                                          | -1.71 | 0.00001 |
| 1429679_at   | Lrrc17  | leucine rich repeat containing 17                                                | -1.71 | 0       |
| 1426933_at   | Oxsr1   | oxidative-stress responsive 1                                                    | -1.71 | 0       |
| 1434131_at   | Rufy1   | RUN and FYVE domain containing 1                                                 | -1.70 | 0       |
| 1426326_at   | Zfp91   | zinc finger protein 91                                                           | -1.70 | 0.00001 |
| 1416038_at   | Snd1    | staphylococcal nuclease and tudor domain containing 1                            | -1.70 | 0       |
| 1451793_at   | Klhl24  | kelch-like 24 (Drosophila)                                                       | -1.70 | 0.00008 |
| 1438798_at   | Rik     | RIKEN cDNA 4931406P16 gene                                                       | -1.69 | 0.00024 |
| 1451771_at   | Tpcn1   | two pore channel 1                                                               | -1.69 | 0.00003 |
| 1424024_at   | Mcf2    | multiple coagulation factor deficiency 2                                         | -1.69 | 0       |
| 1448016_at   | Sass6   | spindle assembly 6 homolog (C. elegans)                                          | -1.69 | 0       |
| 1429088_at   | Lbh     | limb-bud and heart                                                               | -1.69 | 0.00001 |
| 1450068_at   | Baz1b   | bromodomain adjacent to zinc finger domain, 1B                                   | -1.69 | 0.002   |
| 1457009_at   | Rhobtb3 | Rho-related BTB domain containing 3                                              | -1.68 | 0.00001 |
| 1444016_at   | Anxa1   | annexin A1                                                                       | -1.68 | 0.00061 |
| 1451920_a_at | Rfc1    | replication factor C (activator 1) 1                                             | -1.68 | 0.00005 |
| 1437657_at   | Scaper  | S phase cyclin A-associated protein in the ER                                    | -1.67 | 0.00006 |
| 1450378_at   | Tapbp   | TAP binding protein                                                              | -1.67 | 0.00001 |
| 1425481_at   | Cnot6l  | CCR4-NOT transcription complex, subunit 6-like                                   | -1.67 | 0.00001 |
| 1438658_a_at | S1pr3   | sphingosine-1-phosphate receptor 3                                               | -1.67 | 0.0004  |
| 1455089_at   | Gng12   | guanine nucleotide binding protein (G protein), gamma 12                         | -1.67 | 0       |
| 1423886_at   | Lamc1   | laminin, gamma 1                                                                 | -1.67 | 0.00008 |
| 1424350_s_at | Lpgat1  | lysophosphatidylglycerol acyltransferase 1                                       | -1.67 | 0.00008 |
| 1428174_x_at | Khsrp   | KH-type splicing regulatory protein                                              | -1.67 | 0       |
| 1451200_at   | Kif1b   | kinesin family member 1B                                                         | -1.67 | 0.00006 |
| 1418129_at   | Dhcr24  | 24-dehydrocholesterol reductase                                                  | -1.66 | 0.00027 |
| 1422987_at   | Ntn1    | netrin 1                                                                         | -1.66 | 0.00007 |
| 1415965_at   | Scd1    | stearoyl-Coenzyme A desaturase 1                                                 | -1.66 | 0.00001 |
| 1434441_at   | ik      | RIKEN cDNA 1110018J18 gene                                                       | -1.66 | 0       |
| 1438099_at   | Trio    | triple functional domain (PTPRF interacting)                                     | -1.66 | 0.00003 |
| 1419497_at   | Cdkn1b  | cyclin-dependent kinase inhibitor 1B                                             | -1.66 | 0.00005 |
| 1449405_at   | Tns1    | tensin 1                                                                         | -1.65 | 0       |
| 1425991_a_at | Kank2   | KN motif and ankyrin repeat domains 2                                            | -1.65 | 0.00028 |
| 1434282_at   | Ibtk    | inhibitor of Bruton agammaglobulinemia tyrosine kinase                           | -1.65 | 0.00006 |
| 1417951_at   | Eno3    | enolase 3, beta muscle                                                           | -1.64 | 0       |
| 1419356_at   | Klf7    | Kruppel-like factor 7 (ubiquitous)                                               | -1.64 | 0.00001 |
| 1422748_at   | Zeb2    | zinc finger E-box binding homeobox 2                                             | -1.64 | 0.00062 |
| 1421411_at   | Pstpip2 | proline-serine-threonine phosphatase-interacting protein 2                       | -1.63 | 0       |
| 1426235_a_at | Glul    | glutamate-ammonia ligase (glutamine synthetase)                                  | -1.63 | 0.00034 |
| 1450953_at   | Ciao1   | cytosolic iron-sulfur protein assembly 1 homolog (S. cerevisiae)                 | -1.63 | 0       |
| 1439040_at   | Cenpe   | centromere protein E                                                             | -1.63 | 0.00321 |
| 1448710_at   | Cxcr4   | chemokine (C-X-C motif) receptor 4                                               | -1.63 | 0       |
| 1444058_at   | Dzip3   | DAZ interacting protein 3, zinc finger                                           | -1.63 | 0.00077 |
| 1455884_at   | Dpp9    | dipeptidylpeptidase 9                                                            | -1.63 | 0.00001 |
| 1440857_at   | Cad     | carbamoyl-phosphate synthetase 2, aspartate transcarbamylase, and dihydroorotase | -1.63 | 0       |
| 1449512_a_at | Zfx     | zinc finger protein X-linked                                                     | -1.63 | 0.0115  |
| 1434149_at   | Tcf4    | transcription factor 4                                                           | -1.63 | 0.00001 |
| 1429385_at   | Dcaf7   | DDB1 and CUL4 associated factor 7                                                | -1.63 | 0.00005 |
| 1423520_at   | Lmnb1   | lamin B1                                                                         | -1.63 | 0.00001 |
| 1456341_a_at | Klf9    | Kruppel-like factor 9                                                            | -1.63 | 0.0019  |
| 1453295_at   | Asxl2   | additional sex combs like 2 (Drosophila)                                         | -1.62 | 0.00222 |
| 1417161_at   | Cdk2ap2 | CDK2-associated protein 2                                                        | -1.62 | 0       |
| 1419277_at   | Usp48   | ubiquitin specific peptidase 48                                                  | -1.62 | 0.00025 |
| 1422170_at   | Slc5a3  | solute carrier family 5 (inositol transporters), member 3                        | -1.62 | 0.00007 |
| 1433571_at   | Serinc5 | serine incorporator 5                                                            | -1.62 | 0.00001 |
| 1416516_at   | Fscn1   | fascin homolog 1, actin bundling protein (Strongylocentrotus purpuratus)         | -1.62 | 0.00004 |

|              |          |                                                                                                     |       |         |
|--------------|----------|-----------------------------------------------------------------------------------------------------|-------|---------|
|              |          | cysteine and histidine-rich domain (CHORD)-containing, zinc-binding protein 1                       | -1.62 | 0       |
| 1460645_at   | Chordc1  | ubiquitin specific peptidase 7                                                                      | -1.61 | 0.00038 |
| 1437118_at   | Usp7     | phorbol-12-myristate-13-acetate-induced protein 1                                                   | -1.61 | 0.00003 |
| 1418203_at   | Pmaip1   | PDZ and LIM domain 5                                                                                | -1.61 | 0       |
| 1450786_x_at | Pdlim5   | calcineurin binding protein 1                                                                       | -1.61 | 0.00067 |
| 1437794_at   | Cabin1   | ST3 beta-galactoside alpha-2,3-sialyltransferase 1                                                  | -1.61 | 0       |
| 1418946_at   | St3gal1  | topoisomerase (DNA) II beta                                                                         | -1.61 | 0.00001 |
| 1448458_at   | Top2b    | bromodomain PHD finger transcription factor                                                         | -1.61 | 0.00223 |
| 1427311_at   | Bptf     | coiled-coil domain containing 109A                                                                  | -1.61 | 0.00004 |
| 1442031_at   | Ccdc109a | translocated promoter region                                                                        | -1.61 | 0.00057 |
| 1456112_at   | Tpr      | ArfGAP with SH# domain, ankyrin repeat and PH domain 1                                              | -1.61 | 0.00005 |
| 1425573_a_at | Asap1    | carbonyl reductase 2                                                                                | -1.61 | 0       |
| 1418509_at   | Cbr2     | hect (homologous to the E6-AP (UBE3A) carboxyl terminus) domain and RCC1 (CHC1)-like domain (RLD) 1 | -1.60 | 0.01036 |
| 1440437_at   | Herc1    | structural maintenance of chromosomes 1A                                                            | -1.60 | 0.00008 |
| 1417831_at   | Smc1a    | MyoD family inhibitor domain containing                                                             | -1.60 | 0.00002 |
| 1427040_at   | Mdfic    | transmembrane protein 48                                                                            | -1.60 | 0       |
| 1460353_at   | Tmem48   | junction-mediating and regulatory protein                                                           | -1.60 | 0.00043 |
| 1451878_a_at | Jmy      | ethanolamine kinase 1                                                                               | -1.60 | 0.00057 |
| 1430996_at   | Etnk1    | avian musculoaponeurotic fibrosarcoma (v-maf) AS42 oncogene homolog                                 | -1.60 | 0.00002 |
| 1456060_at   | Maf      | lysine (K)-specific demethylase 5A                                                                  | -1.60 | 0.00334 |
| 1452360_a_at | Kdm5a    | growth arrest specific 1                                                                            | -1.60 | 0.00004 |
| 1448494_at   | Gas1     | SLIT-ROBO Rho GTPase activating protein 3                                                           | -1.60 | 0.0003  |
| 1425741_at   | Srgap3   | Musashi homolog 2 (Drosophila)                                                                      | -1.60 | 0.00003 |
| 1421230_a_at | Msi2     | dual-specificity tyrosine-(Y)-phosphorylation regulated kinase 2                                    | -1.59 | 0       |
| 1428637_at   | Dyrk2    | leucine-rich repeat kinase 1                                                                        | -1.59 | 0.00008 |
| 1437330_at   | Lrrk1    | lamin B2                                                                                            | -1.59 | 0.00041 |
| 1451849_a_at | LmnB2    | chromobox homolog 5 (Drosophila HP1a)                                                               | -1.59 | 0.00012 |
| 1421933_at   | Cbx5     | Rap guanine nucleotide exchange factor (GEF) 1                                                      | -1.59 | 0.00018 |
| 1421146_at   | Rapgef1  | amyloid beta precursor protein (cytoplasmic tail) binding protein 2                                 | -1.59 | 0.00007 |
| 1434039_at   | Appbp2   | ArfGAP with coiled-coil, ankyrin repeat and PH domains 2                                            | -1.59 | 0.00001 |
| 1433561_at   | Acap2    | zinc finger protein 664                                                                             | -1.59 | 0.00003 |
| 1437047_at   | Zfp664   | regulation of nuclear pre-mRNA domain containing 2                                                  | -1.59 | 0.0002  |
| 1431425_a_at | Rprd2    | heterogeneous nuclear ribonucleoprotein A/B                                                         | -1.59 | 0.00976 |
| 1426114_at   | Hnrrnpab | ubiquitin specific peptidase 1                                                                      | -1.58 | 0.00006 |
| 1423674_at   | Usp1     | serine/arginine repetitive matrix 2                                                                 | -1.58 | 0.00039 |
| 1427902_at   | Srrm2    | CREB binding protein                                                                                | -1.58 | 0.00952 |
| 1459804_at   | Crebbp   | toll-like receptor 4                                                                                | -1.58 | 0.00186 |
| 1442827_at   | Tlr4     | ankyrin repeat and BTB (POZ) domain containing 2                                                    | -1.58 | 0.00039 |
| 1433453_a_at | Abtb2    | dedicator of cytokinesis 5                                                                          | -1.58 | 0.00001 |
| 1439129_at   | Dock5    | ankyrin repeat and SOCs box-containing 5                                                            | -1.58 | 0       |
| 1449356_at   | Asb5     | vacuolar protein sorting 13B (yeast)                                                                | -1.58 | 0.00124 |
| 1430801_at   | Vps13b   | Rho GTPase activating protein 18                                                                    | -1.58 | 0       |
| 1431133_at   | Arhgap18 | mediator complex subunit 13                                                                         | -1.58 | 0.00455 |
| 1436904_at   | Med13    | zinc finger, CCHC domain containing 24                                                              | -1.57 | 0.00001 |
| 1428432_at   | Zcchc24  | sarcolemma associated protein                                                                       | -1.57 | 0.00065 |
| 1426458_at   | Slmap    | zinc finger protein 617                                                                             | -1.57 | 0.00002 |
| 1449546_a_at | Zfp617   | upstream binding transcription factor, RNA polymerase I                                             | -1.57 | 0.00004 |
| 1460304_a_at | Ubtf     | fragile X mental retardation syndrome 1 homolog                                                     | -1.57 | 0.00008 |
| 1426086_a_at | Fmr1     | mitochondrial carrier homolog 2 (C. elegans)                                                        | -1.57 | 0.00012 |
| 1430969_at   | Mtch2    | thioredoxin reductase 1                                                                             | -1.57 | 0.00017 |
| 1424487_x_at | Txnrd1   | solute carrier organic anion transporter family, member 3a1                                         | -1.57 | 0       |
| 1418030_at   | Slco3a1  | thymopoietin                                                                                        | -1.57 | 0.00024 |
| 1426020_at   | Tmpo     | D17H6S56E-5                                                                                         | -1.57 | 0.00001 |
| 1417821_at   | 5        | DNA segment, Chr 17, human D6S56E 5                                                                 | -1.57 | 0.00476 |
| 1420973_at   | Arid5b   | AT rich interactive domain 5B (MRF1-like)                                                           | -1.57 | 0.00017 |
| 1444295_at   | Neo1     | neogenin                                                                                            | -1.56 | 0.00025 |
| 1452180_at   | Phf17    | PHD finger protein 17                                                                               | -1.56 | 0.00001 |
| 1422340_a_at | Actg2    | actin, gamma 2, smooth muscle, enteric                                                              | -1.56 | 0.00046 |
| 1456088_at   | Xiap     | X-linked inhibitor of apoptosis                                                                     | -1.56 | 0.00036 |
| 1429362_a_at | Sf3b2    | splicing factor 3b, subunit 2                                                                       | -1.56 | 0.00004 |
| 1418890_a_at | Rab3d    | RAB3D, member RAS oncogene family                                                                   | -1.56 | 0       |
| 1456533_at   | Dpy19l1  | dpy-19-like 1 (C. elegans)                                                                          | -1.56 | 0.00001 |
| 1454289_at   | Zhx3     | zinc fingers and homeoboxes 3                                                                       | -1.56 | 0.00029 |
| 1423015_at   | Kirrel   | kin of IRRE like (Drosophila)                                                                       | -1.55 | 0       |
| 1427992_a_at | Rab12    | RAB12, member RAS oncogene family                                                                   | -1.55 | 0.00007 |
| 1450255_at   | Arhgap31 | Rho GTPase activating protein 31                                                                    | -1.55 | 0.00002 |
| 1427884_at   | Col3a1   | collagen, type III, alpha 1                                                                         | -1.55 | 0.02103 |
| 1426755_at   | Ckap4    | cytoskeleton-associated protein 4                                                                   | -1.55 |         |

|              |             |                                                                     |       |         |
|--------------|-------------|---------------------------------------------------------------------|-------|---------|
| 1451287_s_at | Aif1        | allograft inflammatory factor 1-like                                | -1.55 | 0.00002 |
| 1437864_at   | Adipor2     | adiponectin receptor 2                                              | -1.55 | 0.00069 |
| 1455960_at   | Megf9       | multiple EGF-like-domains 9                                         | -1.54 | 0.00002 |
| 1426686_s_at | Map3k3      | mitogen-activated protein kinase kinase kinase 3                    | -1.54 | 0       |
| 1436356_at   | Samd4       | sterile alpha motif domain containing 4                             | -1.54 | 0.00004 |
| 1423756_s_at | Igfbp4      | insulin-like growth factor binding protein 4                        | -1.54 | 0.00003 |
| 1427353_at   | Clasp1      | CLIP associating protein 1                                          | -1.54 | 0.00002 |
| 1419099_x_at | Stom        | stomatin                                                            | -1.54 | 0.00002 |
| 1439555_at   | Rlf         | rearranged L-myc fusion sequence                                    | -1.54 | 0.00088 |
| 1428971_at   | Ccny        | cyclin Y                                                            | -1.54 | 0.00003 |
| 1452038_at   | Capza1      | capping protein (actin filament) muscle Z-line, alpha 1             | -1.54 | 0       |
|              | 6330406I15R |                                                                     |       |         |
| 1426937_at   | ik          | RIKEN cDNA 6330406I15 gene                                          | -1.54 | 0.00001 |
| 1416625_at   | Serping1    | serine (or cysteine) peptidase inhibitor, clade G, member 1         | -1.53 | 0.00016 |
| 1449042_at   | Ctcf        | CCCTC-binding factor                                                | -1.53 | 0.00634 |
| 1452703_at   | Ahcyl2      | S-adenosylhomocysteine hydrolase-like 2                             | -1.53 | 0.00002 |
| 1418514_at   | Mtf2        | metal response element binding transcription factor 2               | -1.53 | 0.00001 |
| 1421319_at   | Ptgfrn      | prostaglandin F2 receptor negative regulator                        | -1.53 | 0.0001  |
|              | 4932438A13  |                                                                     |       |         |
| 1458401_at   | Rik         | RIKEN cDNA 4932438A13 gene                                          | -1.53 | 0.00002 |
| 1429517_at   | Zfyve20     | zinc finger, FYVE domain containing 20                              | -1.53 | 0.00033 |
| 1434877_at   | Nptx1       | neuronal pentraxin 1                                                | -1.53 | 0.00002 |
| 1440868_at   | Gabpb2      | GA repeat binding protein, beta 2                                   | -1.53 | 0.00089 |
| 1456488_at   | Wdr33       | WD repeat domain 33                                                 | -1.53 | 0.00046 |
| 1451411_at   | Gprc5b      | G protein-coupled receptor, family C, group 5, member B             | -1.53 | 0.00006 |
|              | LOC1005048  |                                                                     |       |         |
| 1444281_at   | 41          | hypothetical LOC100504841                                           | -1.53 | 0.00261 |
| 1440397_at   | Cacna2d1    | calcium channel, voltage-dependent, alpha2/delta subunit 1          | -1.53 | 0.00099 |
| 1426744_at   | Srebf2      | sterol regulatory element binding factor 2                          | -1.52 | 0.00013 |
| 1418731_at   | Rlim        | ring finger protein, LIM domain interacting                         | -1.52 | 0.00002 |
| 1438046_at   | AU019823    | expressed sequence AU019823                                         | -1.52 | 0.00008 |
| 1451045_at   | Syt13       | synaptotagmin XIII                                                  | -1.52 | 0.00007 |
| 1424216_a_at | Papola      | poly (A) polymerase alpha                                           | -1.52 | 0.00027 |
| 1426259_at   | Pank3       | pantothenate kinase 3                                               | -1.52 | 0.00276 |
| 1453582_at   | Chka        | choline kinase alpha                                                | -1.52 | 0.00012 |
| 1443868_at   | Atp13a3     | ATPase type 13A3                                                    | -1.52 | 0.00005 |
| 1450629_at   | Lima1       | LIM domain and actin binding 1                                      | -1.51 | 0.00042 |
| 1448008_at   | Ankhd1      | ankyrin repeat and KH domain containing 1                           | -1.51 | 0.00028 |
|              |             | SWI/SNF related, matrix associated, actin dependent regulator of    |       |         |
| 1423417_at   | Smarcc1     | chromatin, subfamily c, member 1                                    | -1.51 | 0.00024 |
| 1427918_a_at | Rhoq        | ras homolog gene family, member Q                                   | -1.51 | 0       |
| 1438773_at   | Steap2      | six transmembrane epithelial antigen of prostate 2                  | -1.51 | 0.00003 |
|              | 1810030O07  |                                                                     |       |         |
| 1433867_at   | Rik         | RIKEN cDNA 1810030O07 gene                                          | -1.51 | 0       |
| 1427279_at   | Clip4       | CAP-GLY domain containing linker protein family, member 4           | -1.51 | 0.00002 |
| 1423505_at   | Tagln       | transgelin                                                          | -1.51 | 0.00004 |
| 1451747_a_at | Atg12       | autophagy-related 12 (yeast)                                        | -1.51 | 0.00001 |
| 1422032_a_at | Zfand6      | zinc finger, AN1-type domain 6                                      | -1.51 | 0.00001 |
| 1438032_at   | Lrch1       | leucine-rich repeats and calponin homology (CH) domain containing 1 | -1.51 | 0.00016 |
| 1425592_at   | Tnpo2       | transportin 2 (importin 3, karyopherin beta 2b)                     | -1.50 | 0.00004 |
| 1419502_at   | Ghdc        | GH3 domain containing                                               | -1.50 | 0.00001 |
| 1450377_at   | Thbs1       | thrombospondin 1                                                    | -1.50 | 0.00005 |
